# Supplementary material for: Molecular communications in complex systems of dynamic supramolecular polymers
Source: PubMed Central journal article supplement (PMC9021206; doi:10.1038/s41467-022-29804-5), 2022-04-20
Supplement: 41467_2022_29804_MOESM1_ESM.pdf [file 41467_2022_29804_MOESM1_ESM.pdf]

Supplementary Information:  
Molecular Communications in Complex Systems  
of Dynamic Supramolecular Polymers

Martina Crippa<sup>1</sup>, Claudio Perego<sup>2</sup>, Anna L. de Marco<sup>2,3</sup>, and  
Giovanni M. Pavan<sup>1,2,\*</sup>

<sup>1</sup>Department of Applied Science and Technology, Politecnico di  
Torino, Corso Duca degli Abruzzi 24, 10129 Torino, Italy

<sup>2</sup>Department of Innovative Technologies, University of Applied  
Sciences and Arts of Southern Switzerland, Polo Universitario  
Lugano, Campus Est, Via la Santa 1, 6962 Lugano-Viganello,  
Switzerland

<sup>3</sup>Department of Physics, Università degli Studi di Genova, Via  
Dodecaneso 33, 16100 Genova, Italy

\*corresponding author: Giovanni M. Pavan  
([giovanni.pavan@polito.it](mailto:giovanni.pavan@polito.it))

## Supplementary Figures

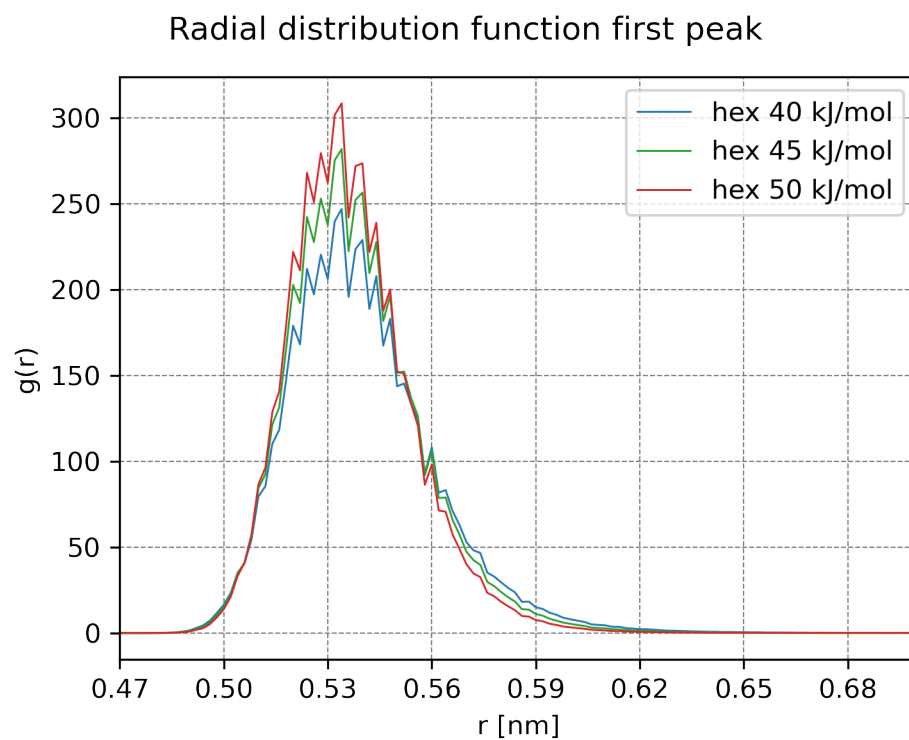

Supplementary Figure 1: First peak of the radial distribution function for the equilibrium part of three different  $M$  systems ( $\epsilon = 40 \text{ kJ mol}^{-1}$ ,  $45 \text{ kJ mol}^{-1}$  and  $50 \text{ kJ mol}^{-1}$ ).

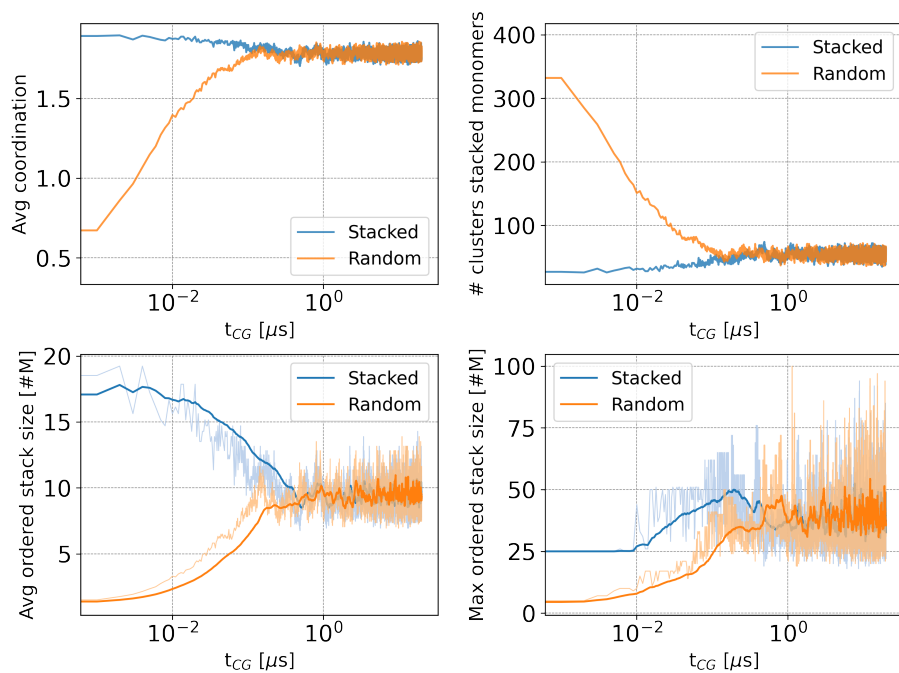

Supplementary Figure 2: Self-assembly observables for the R and S systems interacting with  $\epsilon = 40 \text{ kJ mol}^{-1}$ : average coordination (top left), number of assemblies (top right), average size of assemblies (bottom left), size of the largest assembly (bottom right).

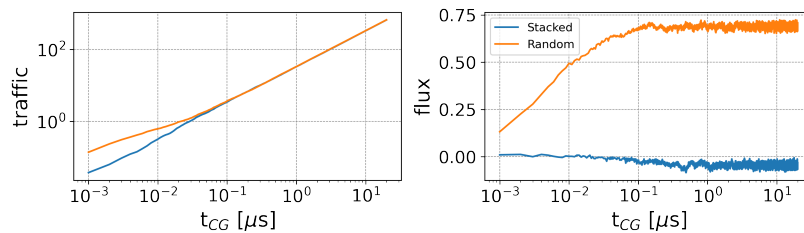

Supplementary Figure 3: Traffic and flux for the R and S systems interacting with  $\epsilon = 40 \text{ kJ mol}^{-1}$ .

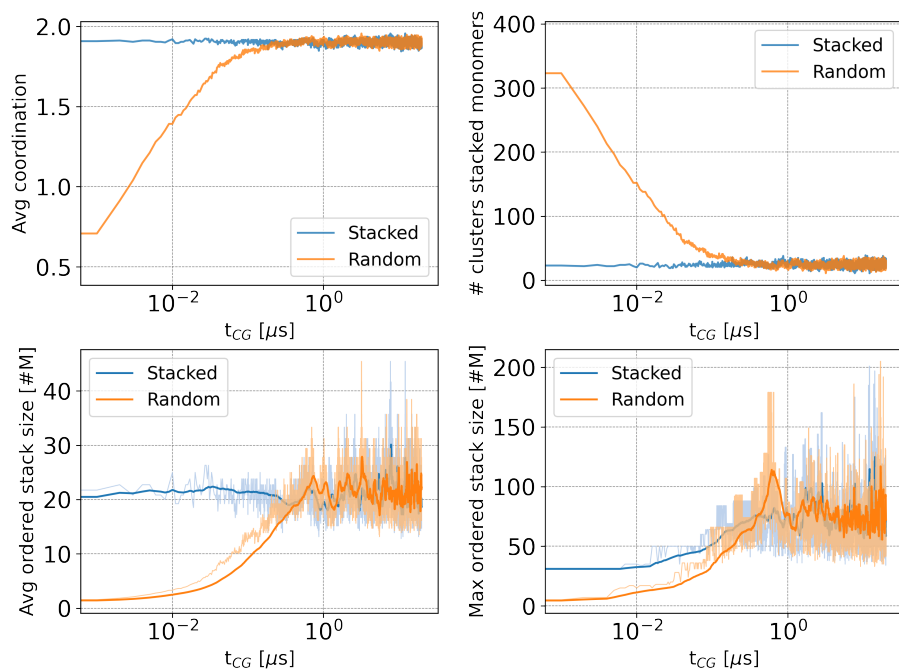

Supplementary Figure 4: Self-assembly observables for the R and S systems interacting with  $\epsilon = 45 \text{ kJ mol}^{-1}$ : average coordination (top left), number of assemblies (top right), average size of assemblies (bottom left), size of the largest assembly (bottom right).

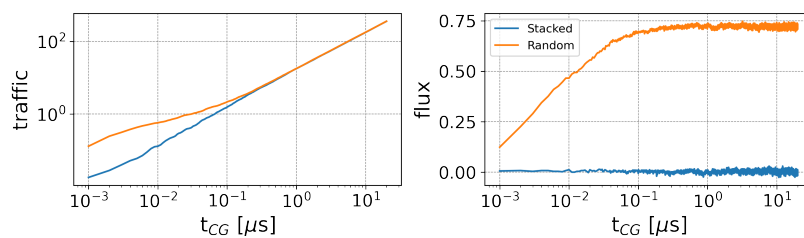

Supplementary Figure 5: Traffic and flux for the R and S systems interacting with  $\epsilon = 45 \text{ kJ mol}^{-1}$ .

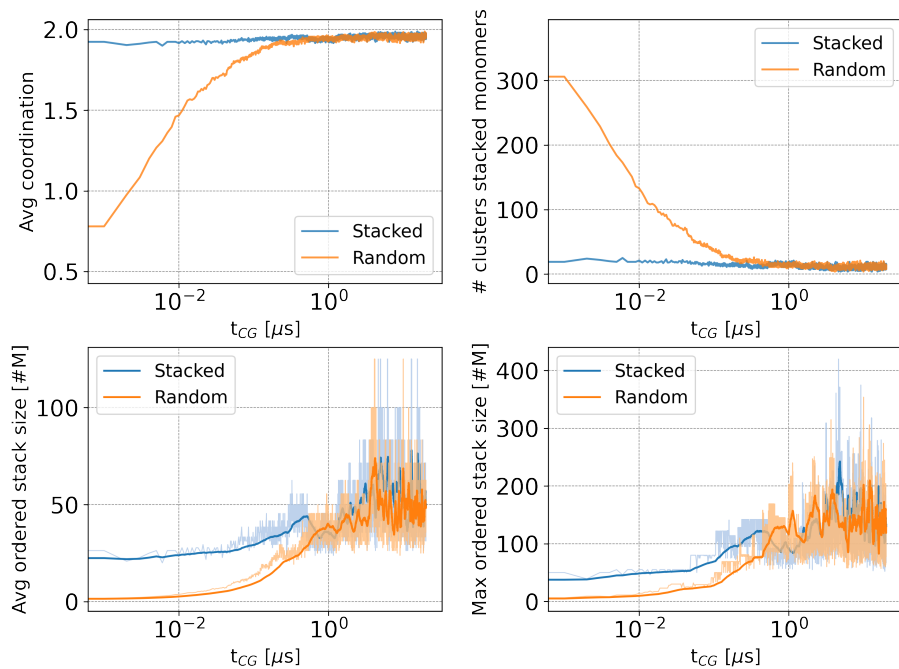

Supplementary Figure 6: Self-assembly observables for the R and S systems interacting with  $\epsilon = 50 \text{ kJ mol}^{-1}$ : average coordination (top left), number of assemblies (top right), average size of assemblies (bottom left), size of the largest assembly (bottom right).

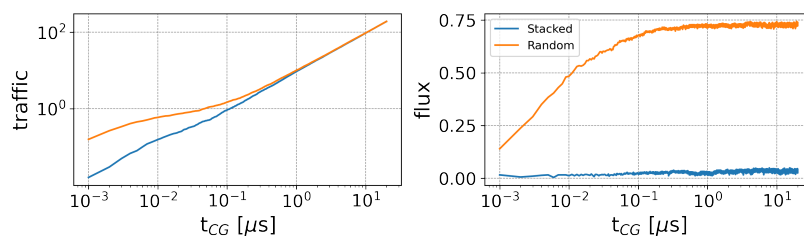

Supplementary Figure 7: Traffic and flux for the R and S systems interacting with  $\epsilon = 50 \text{ kJ mol}^{-1}$ .

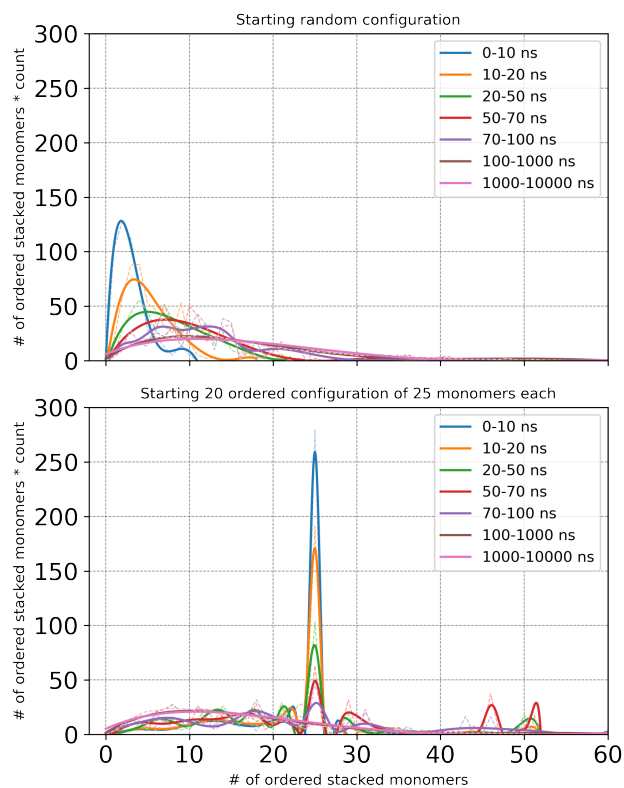

Supplementary Figure 8: Distribution of monomers into aggregates of different sizes computed over different time intervals of the CG-MD trajectory, comparing R (top) and S (bottom) systems interacting by  $\epsilon = 40 \text{ kJ mol}^{-1}$ . Comparing the two panels, convergence between the S and R system population distributions after  $t_1 = 1 \mu\text{s}$  (pink curve) is observed.

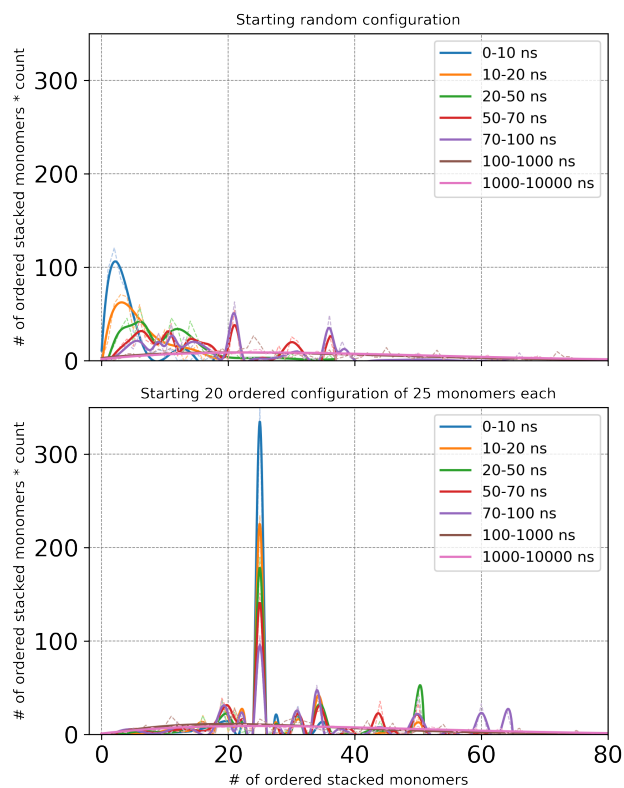

Supplementary Figure 9: Distribution of monomers into aggregates of different sizes computed over different time intervals of the CG-MD trajectory, comparing R (top) and S (bottom) systems interacting by  $\epsilon = 45 \text{ kJ mol}^{-1}$ . Comparing the two panels, convergence between the S and R system population distributions after  $t_1 = 1 \mu\text{s}$  (pink curve) is observed.

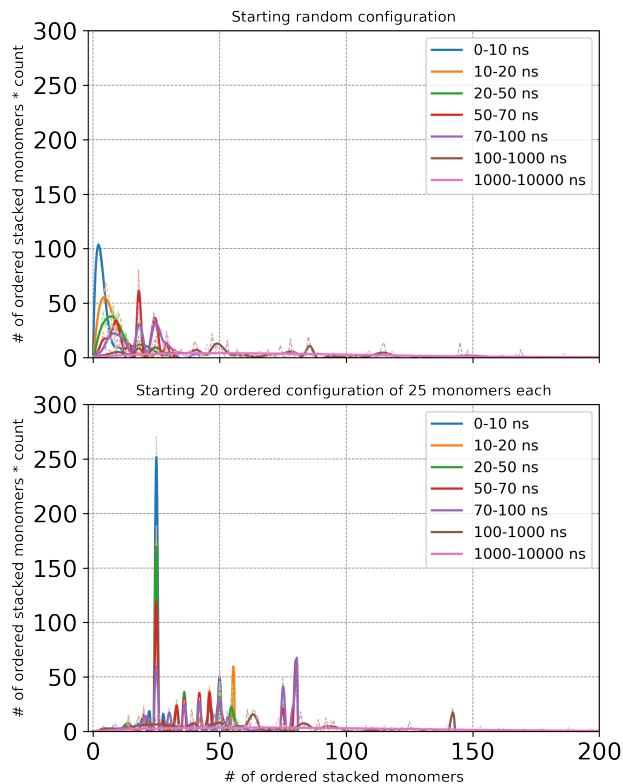

Supplementary Figure 10: Distribution of monomers into aggregates of different sizes computed over different time intervals of the CG-MD trajectory, comparing R (top) and S (bottom) systems interacting by  $\epsilon = 50 \text{ kJ mol}^{-1}$ . Comparing the two panels, convergence between the S and R system population distributions after  $t_1 = 1 \mu\text{s}$  (pink curve) is observed.

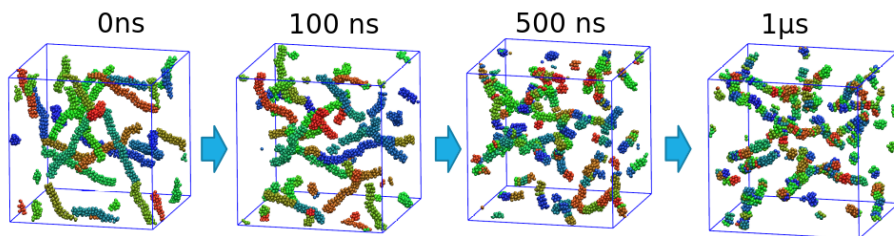

Supplementary Figure 11: Snapshots of the S system ( $\epsilon = 40 \text{ kJ mol}^{-1}$ ) at different times: at time  $t_0$  each fibre is colored with a different color. During the MD the fibres exchange monomers and after  $t_1 = 1 \mu\text{s}$  the new fibres are a mixture of the initial fibres.



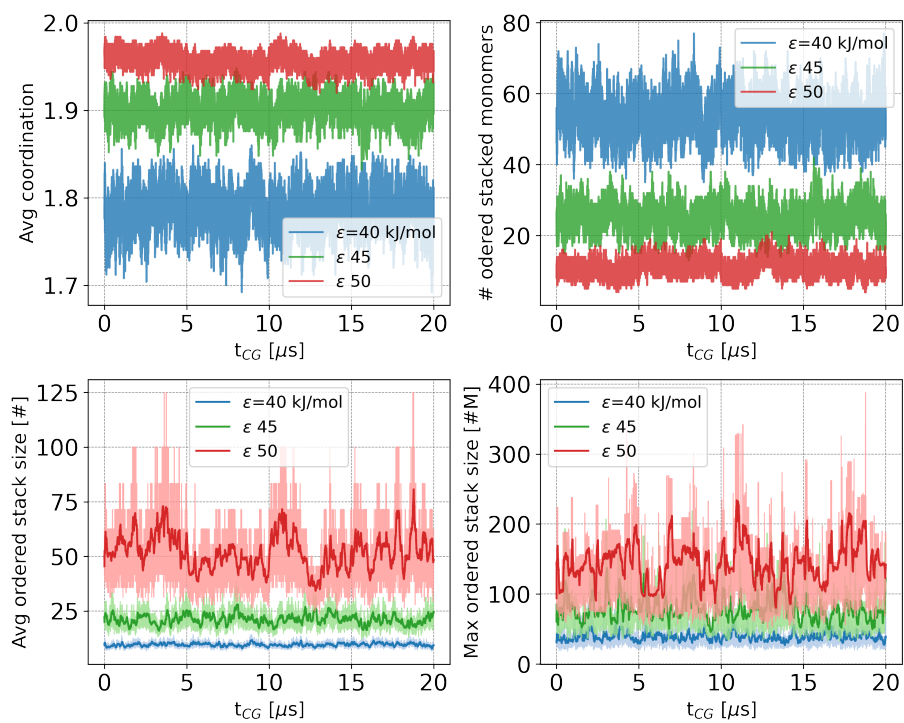

Supplementary Figure 12: Self-assembly observables comparison between  $\epsilon = 40 \text{ kJ mol}^{-1}$ ,  $45 \text{ kJ mol}^{-1}$  and  $50 \text{ kJ mol}^{-1}$  M systems at the equilibrium: average coordination (top left), number of assemblies (top right), average size of assemblies (bottom left), size of the largest assembly (bottom right).

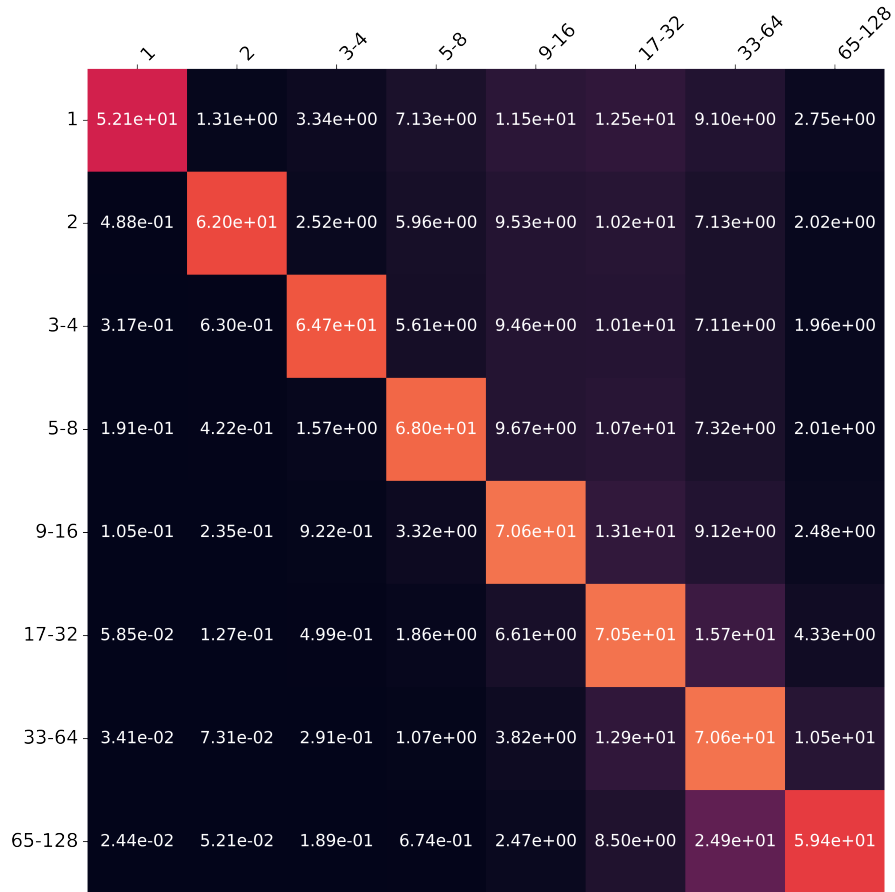

Supplementary Figure 13: Sub-section of the probability transition matrix (same as reported in Figure 3a, left panel). The percentage probabilities are reported using scientific notations with three significant digits: in the main text the probabilities  $< 0.5$  are rounded to zero.

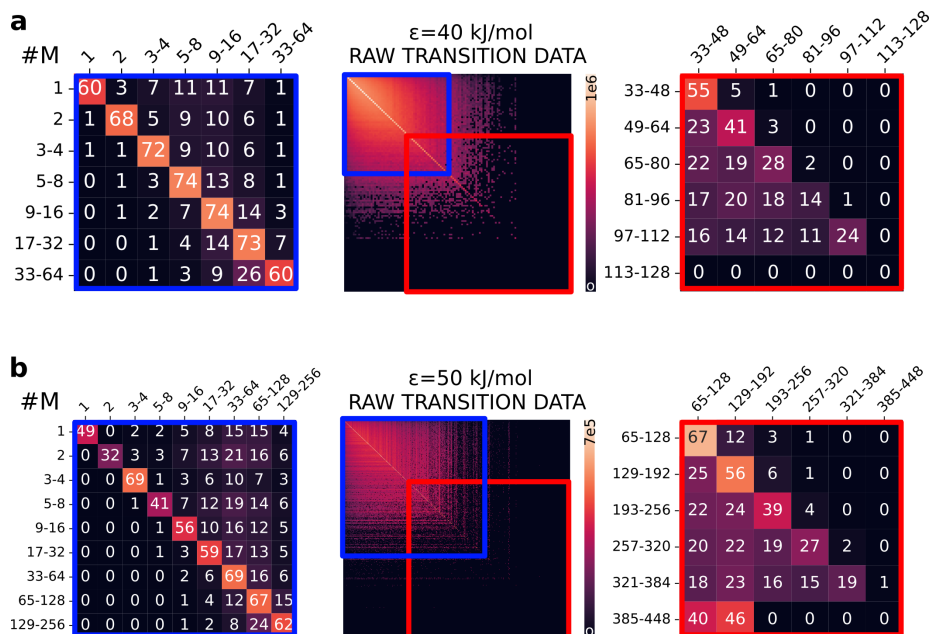

Supplementary Figure 14: Transition matrices for the M-model. (a)  $\epsilon = 40$  kJ mol<sup>-1</sup> and (b)  $\epsilon = 50$  kJ mol<sup>-1</sup>. Each entry ( $i, j$ ) of the raw transition matrices (central column) shows how many monomers transit from an assembly of size  $i$  to an assembly of size  $j$  every  $\Delta\tau = 300$  ps of CG-MD time; The left and right panels report two sub-regions of the transition probability matrix (red and blue rectangles). Here, the size of the aggregates are grouped for clarity. The numbers in the cells indicate the percentage probability (the 0s identify transitions with probability  $< 0.5$ ). The raw transition matrices are colored in log scale.

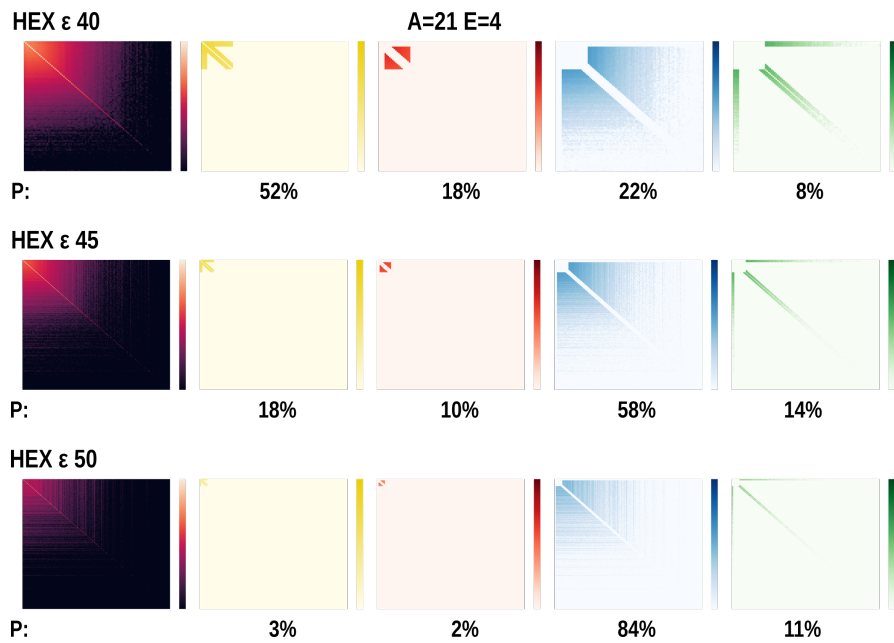

Supplementary Figure 15: Assembly transition matrices for the  $\mathbf{M}$  systems (left), decomposed into areas identifying different classes of polymerisation/depolymerisation mechanisms (see Methods for details). The areas are defined by the parameters  $A = 21$  and  $E = \langle A \rangle / 5 \approx 4$ , as explained in the main text. The percentage is computed as the sum of each entry of the matrix in the considered area divided by the sum of all the entries of the matrix, without considering the diagonal: this gives an estimate of the predominant mechanism by which the system communicates. The obtained percentage are reported under each areas.

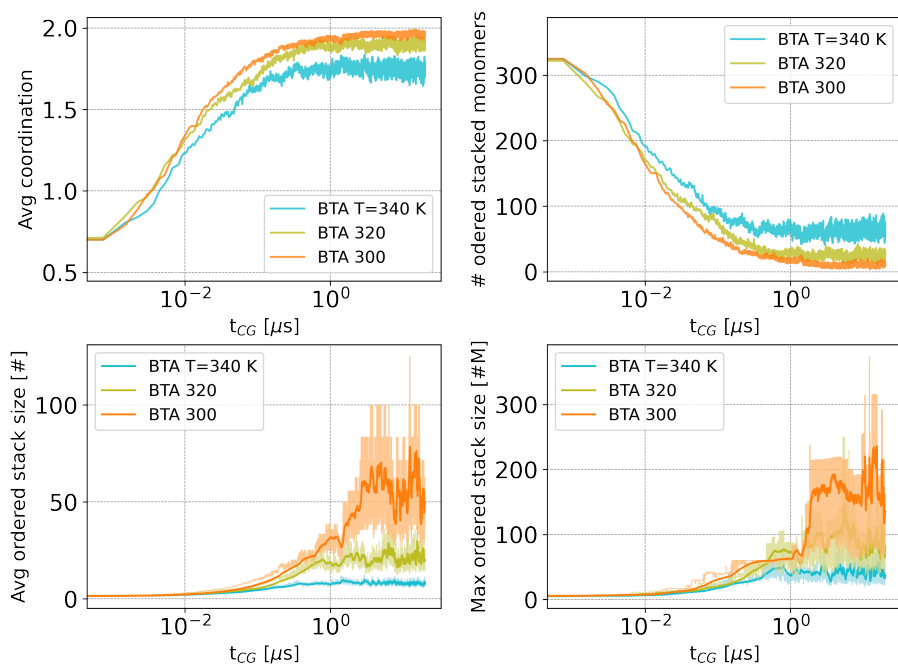

Supplementary Figure 16: Self-assembly observables comparison between  $T = 340$  K,  $T = 320$  K and  $T = 300$  K **BTA** system starting from random conformations in log scale: average coordination (top left), number of assemblies (top right), average size of assemblies (bottom left), size of the largest assembly (bottom right).

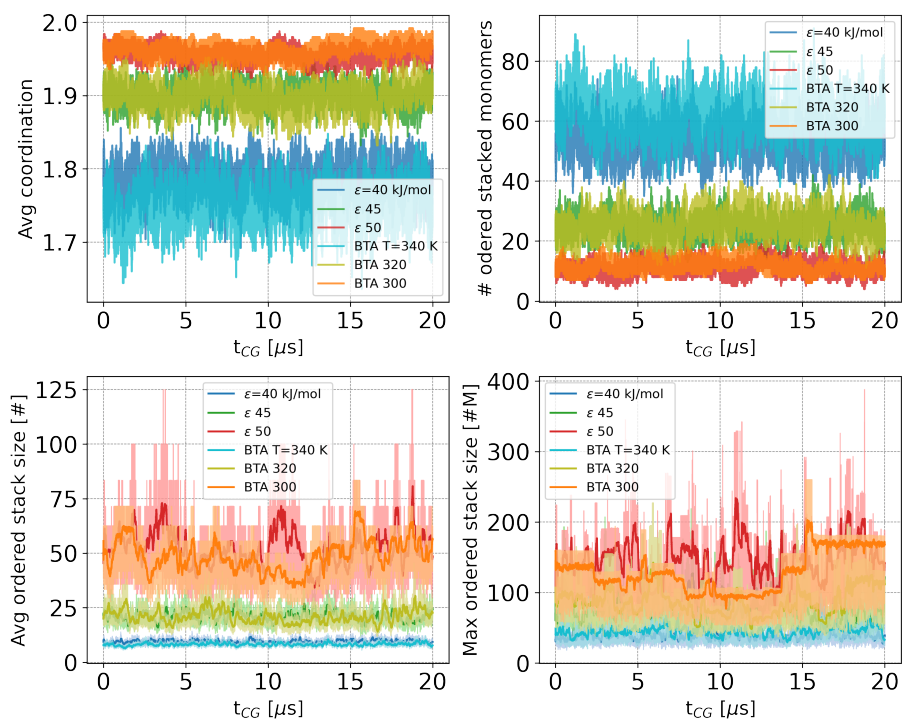

Supplementary Figure 17: Self-assembly observables comparison between  $T = 340$  K,  $T = 320$  K and  $T = 300$  K **BTA** system and  $\epsilon = 40$  kJ mol<sup>-1</sup>, 45 kJ mol<sup>-1</sup> and 50 kJ mol<sup>-1</sup> **M** systems: average coordination (top left), number of assemblies (top right), average size of assemblies (bottom left), size of the largest assembly (bottom right).

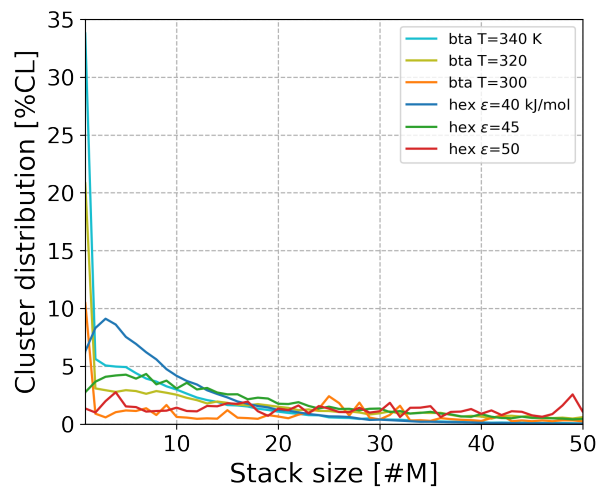

Supplementary Figure 18: Assembly distributions comparison between  $\epsilon = 40 \text{ kJ mol}^{-1}$ ,  $45 \text{ kJ mol}^{-1}$  and  $50 \text{ kJ mol}^{-1}$  **M** systems and  $T = 340 \text{ K}$ ,  $T = 320 \text{ K}$  and  $T = 300 \text{ K}$  **BTA** system.

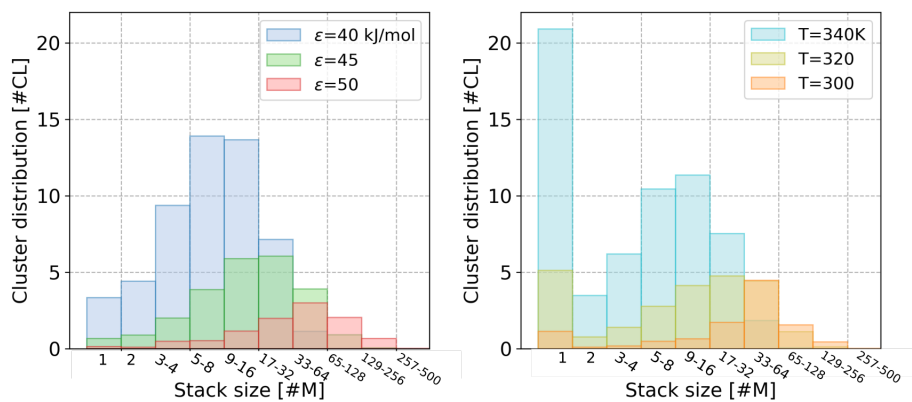

Supplementary Figure 19: Distribution of assemblies of different sizes over the total number of assemblies. Comparison between  $\epsilon = 40 \text{ kJ mol}^{-1}$ ,  $45 \text{ kJ mol}^{-1}$  and  $50 \text{ kJ mol}^{-1}$  **M** systems (left) and  $T = 340 \text{ K}$ ,  $T = 320 \text{ K}$  and  $T = 300 \text{ K}$  **BTA** system (right): the sizes are grouped in binary size-ranges and reported in log scale along the x axis.

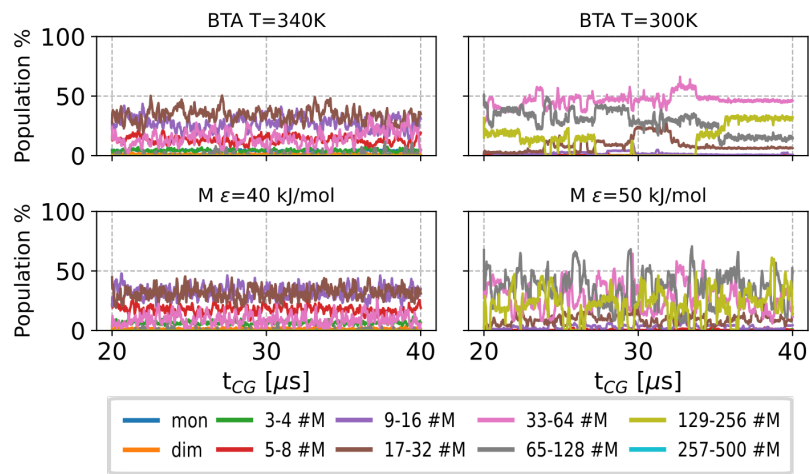

Supplementary Figure 20: Percentage of monomers belonging to different size aggregates for the **BTA** systems at  $T = 340$  K (top left) and  $T = 300$  K (top right) and **M** system  $\epsilon = 40$  kJ mol<sup>-1</sup> (bottom left) and 50 kJ mol<sup>-1</sup> (bottom right).



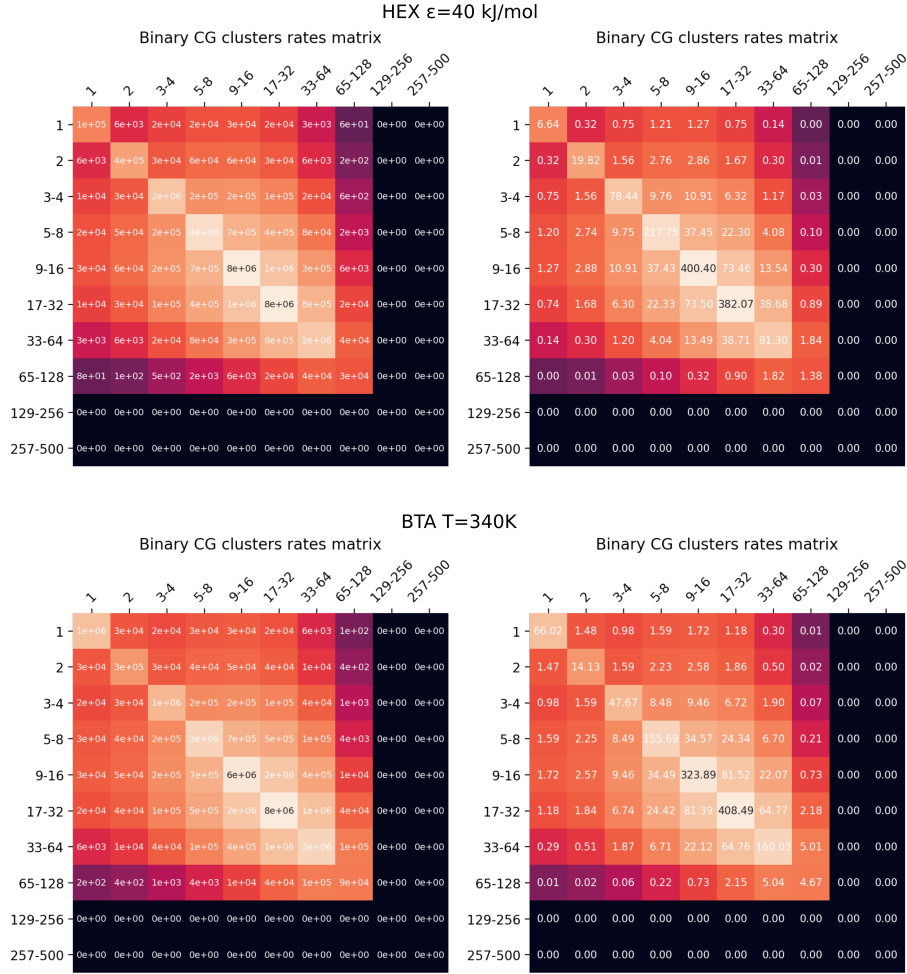

Supplementary Figure 21:  $\mathbf{M}$  with  $\epsilon = 40 \text{ kJ mol}^{-1}$  (top), and  $T = 340 \text{ K}$  (bottom): raw transition matrices grouped in binary size-ranges (left) and transition rate matrices in  $\text{ns}^{-1}$ , obtained from raw data matrices divided by the trajectory time-length (right), both colored in log scale. During the simulations we sampled a total of  $1.4 \times 10^7$  and  $1.8 \times 10^7$  monomer transitions between aggregates of different size (off-diagonal entries) for the  $\mathbf{M}$  and  $\mathbf{BTA}$  models respectively,  $3 \times 10^{-4}\%$  and  $9 \times 10^{-4}\%$  of which can be considered as exchange of monomers/oligomers from the bulk of existing fibres. This indicates that in both systems  $> 99\%$  of transition events involves exchange at the fibres tips.

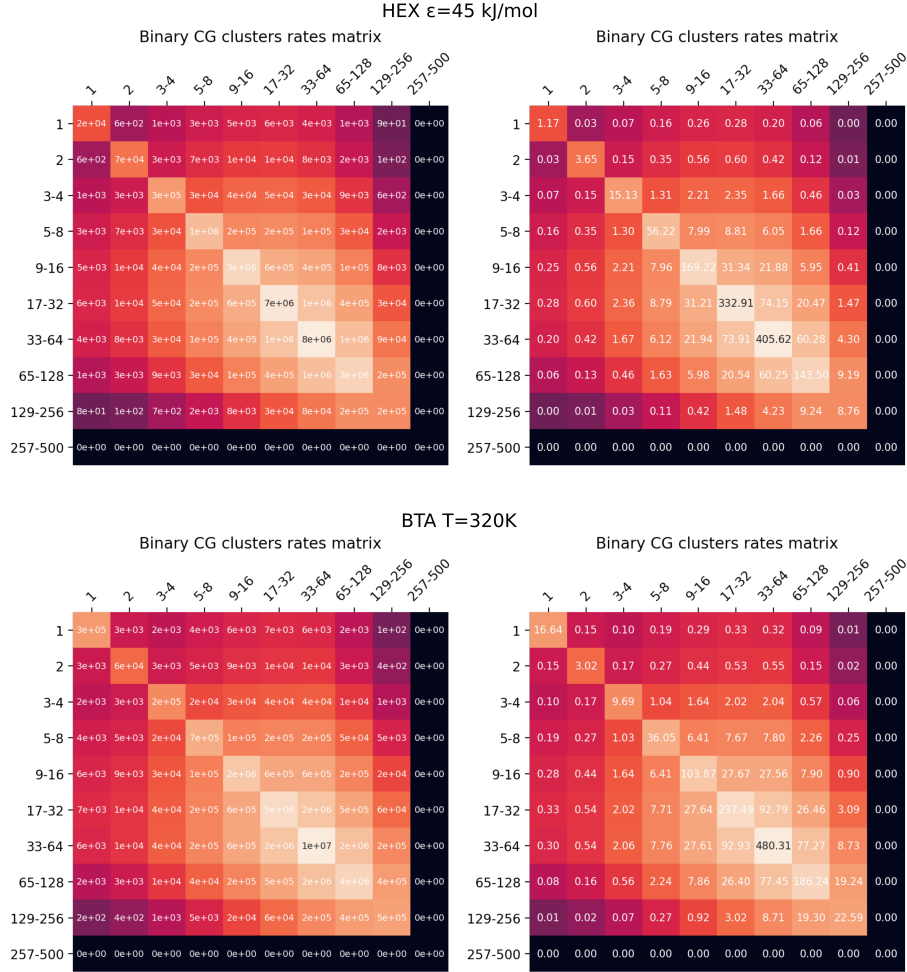

Supplementary Figure 22:  $\mathbf{M}$  with  $\epsilon = 45 \text{ kJ mol}^{-1}$  (top), and  $T = 320 \text{ K}$  (bottom): raw transition matrices grouped in binary size-ranges (left) and transition rate matrices in  $\text{ns}^{-1}$ , obtained from raw data matrices divided by the trajectory time-length (right), both colored in log scale. During the simulations we sampled a total of  $1.7 \times 10^7$  and  $2.1 \times 10^7$  monomer transitions between aggregates of different size (off-diagonal entries) for the  $\mathbf{M}$  and  $\mathbf{BTA}$  models respectively,  $1 \times 10^{-4}\%$  and  $3 \times 10^{-4}\%$  of which can be considered as exchange of monomers/oligomers from the bulk of existing fibres ( $> 99\%$  of transition events involve exchange at the fibres tips, in both systems).

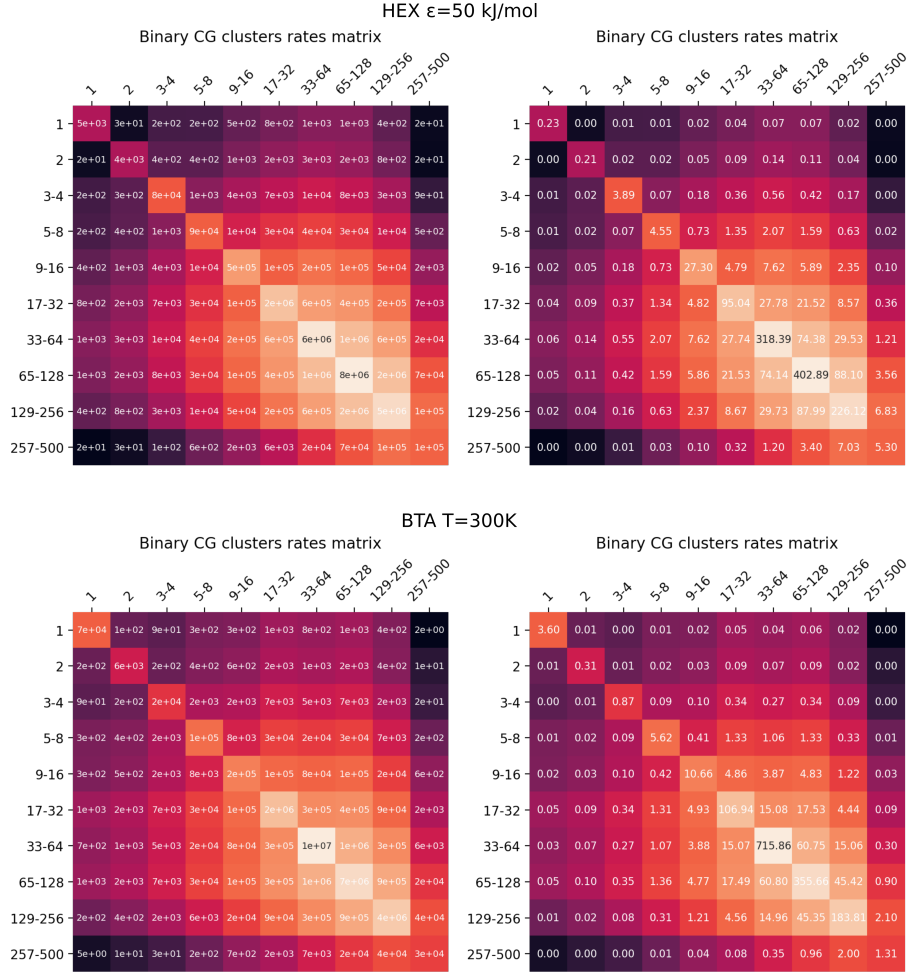

Supplementary Figure 23:  $\mathbf{M}$  with  $\epsilon = 50 \text{ kJ mol}^{-1}$  (top), and  $T = 300 \text{ K}$  (bottom): raw transition matrices grouped in binary size-ranges (left) and transition rate matrices in  $\text{ns}^{-1}$ , obtained from raw data matrices divided by the trajectory time-length (right), both colored in log scale. During the simulations we sampled a total of  $1.9 \times 10^7$  and  $1.3 \times 10^7$  monomer transitions between aggregates of different size (off-diagonal entries) for the  $\mathbf{M}$  and  $\mathbf{BTA}$  models respectively,  $4 \times 10^{-5}\%$  and  $9 \times 10^{-5}\%$  of which can be considered as exchange of monomers/oligomers from the bulk of existing fibres ( $> 99\%$  of transition events involve exchange at the fibres tips, in both systems).

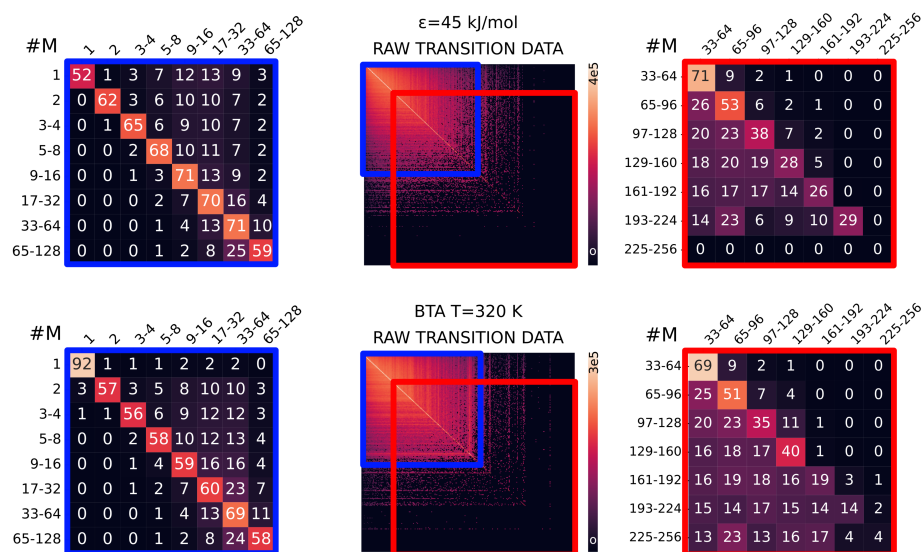

Supplementary Figure 24: Comparison between **BTA**  $T = 320$  K (bottom) and **M** with  $\epsilon = 45$  kJ mol<sup>-1</sup> (top). The raw transition matrix (center) and transition probability sub-matrices (left and right panels, the blue and red rectangles indicate the region highlighted) are reported. Here, the size of the aggregates are grouped for clarity. The numbers in the cells indicate the percentage probability (the 0s identify transitions with probability < 0.5). The transition matrices are colored in log scale.

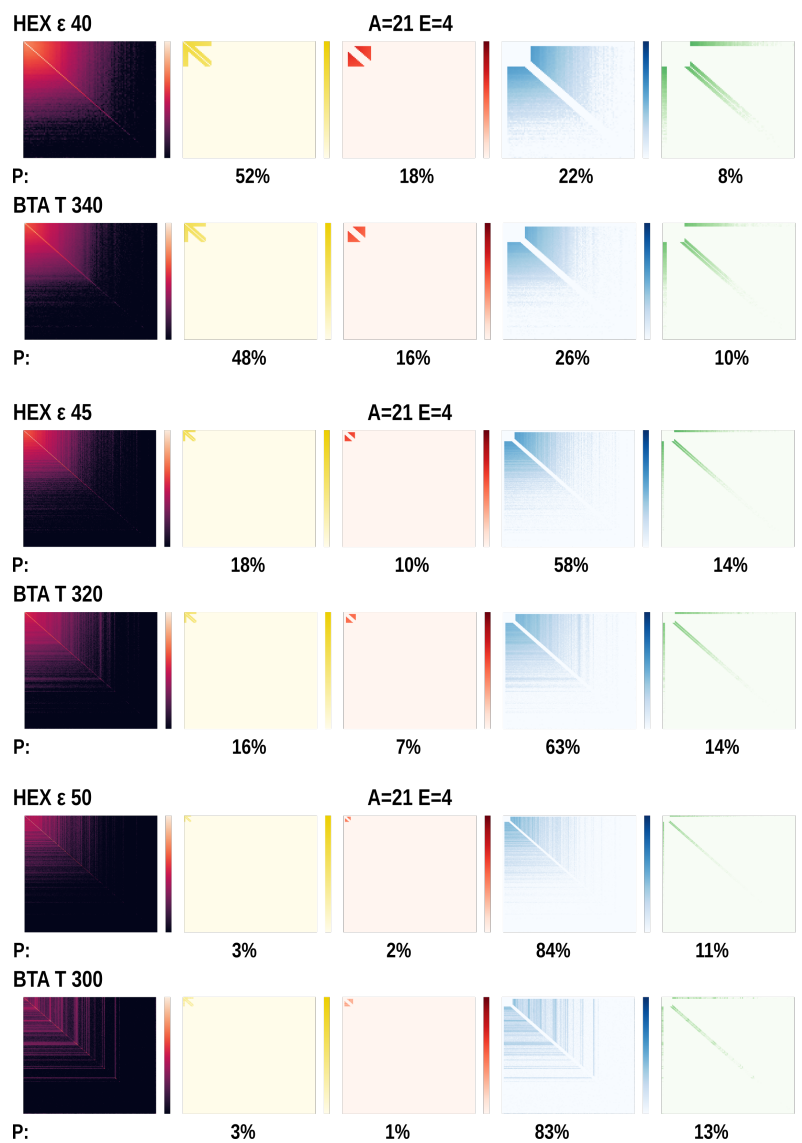

Supplementary Figure 25: Assembly transition matrices (see Methods for details): comparison between **M** system and **BTA** system for  $A = 21$  and  $E = \langle A \rangle / 5 \approx 4$ .

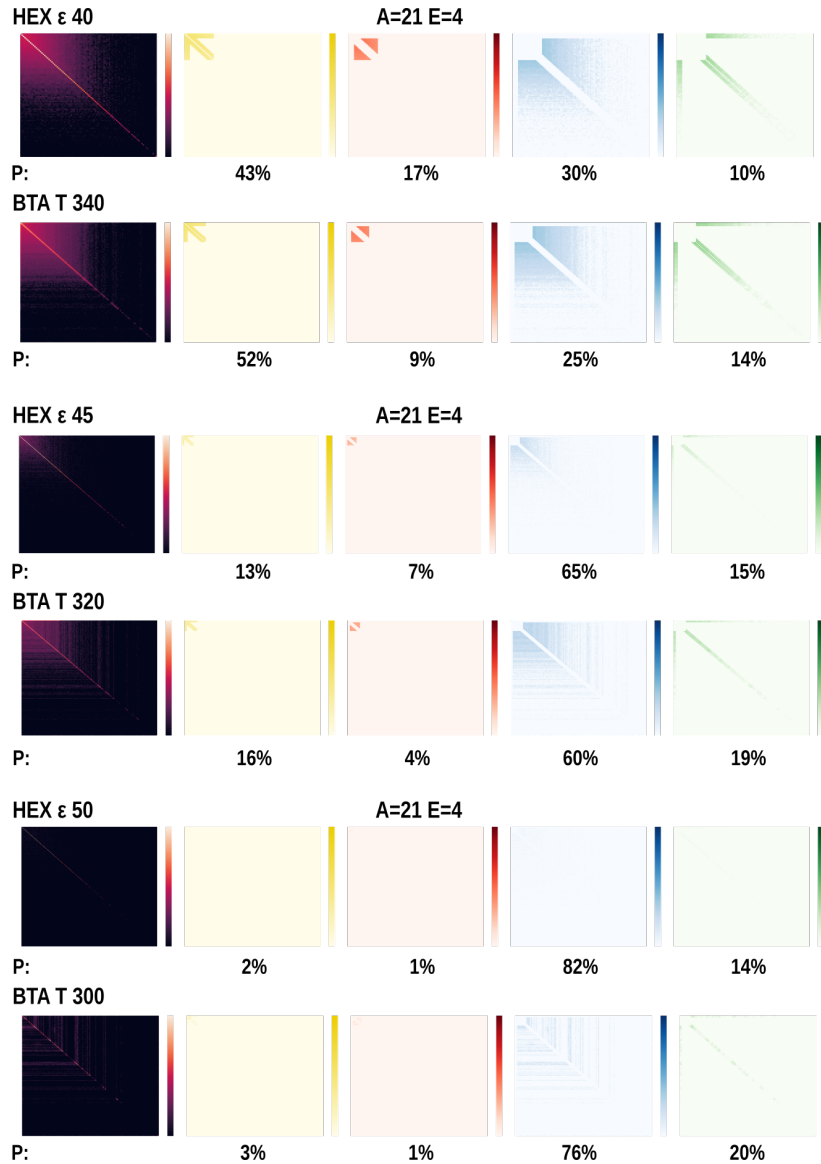

Supplementary Figure 26: Assembly transition matrices (see Methods for details): comparison between **M** system and **BTA** system for  $A = 21$  and  $E = \langle A \rangle / 5 \approx 4$  with cut-off radius  $r_{\text{rcut}} = 0.7\text{nm}$ .

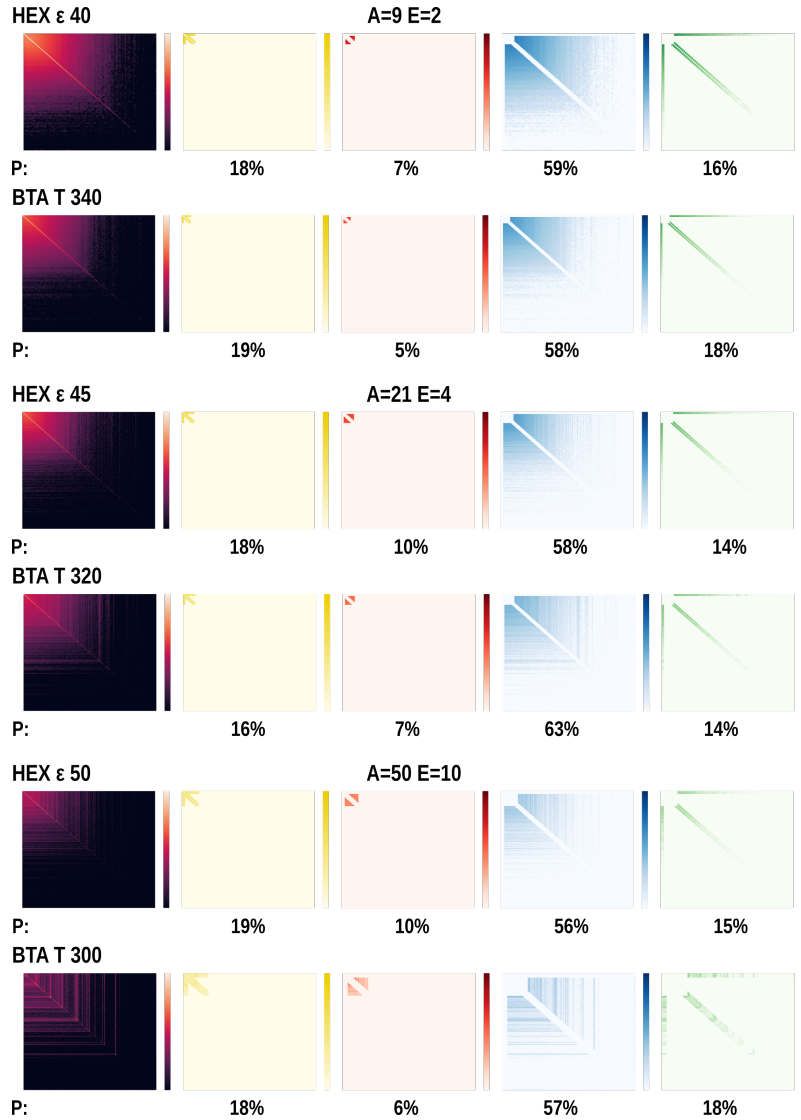

Supplementary Figure 27: Assembly transition matrices (see Methods for details): comparison between **M** system and **BTA** system for  $A = \langle \text{size} \rangle$ , namely the average size relative to the system under study and  $E = \langle A \rangle / 5$ .

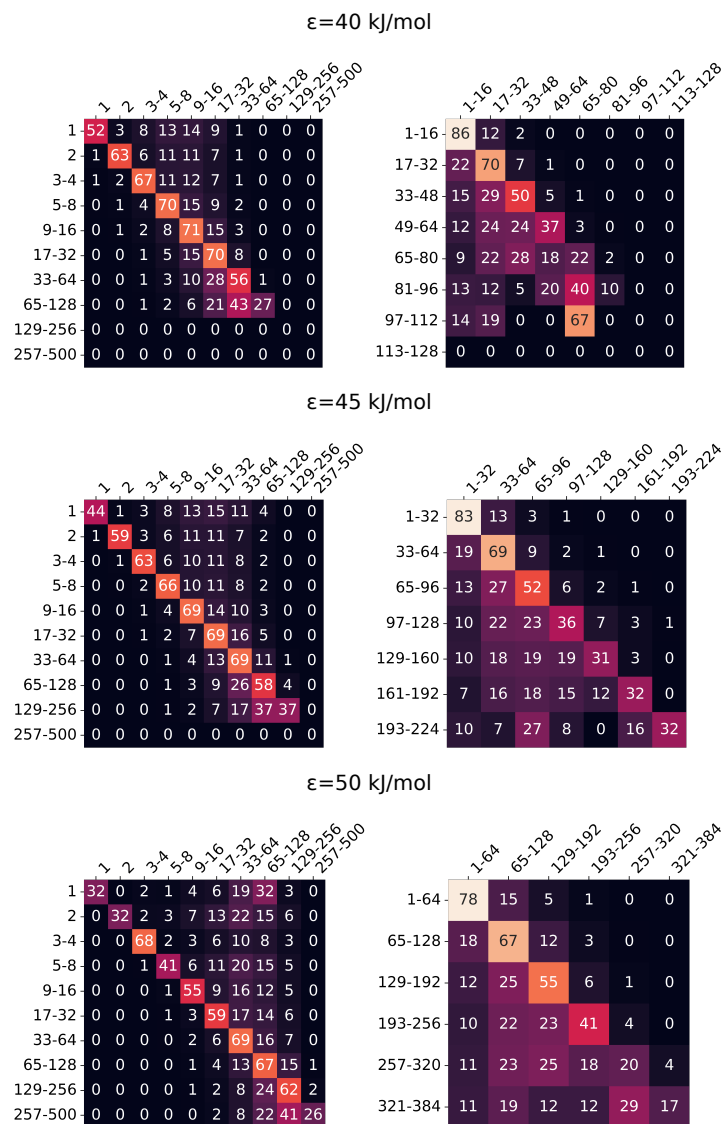

Supplementary Figure 28: Probability transition matrices for **M** systems sampled every  $\Delta\tau = 3$  ns and cut-off  $r_{\text{cut}} = 0.6$  nm. The data is grouped in size-ranges (binary and regular subdivision in the left and right panels, respectively).



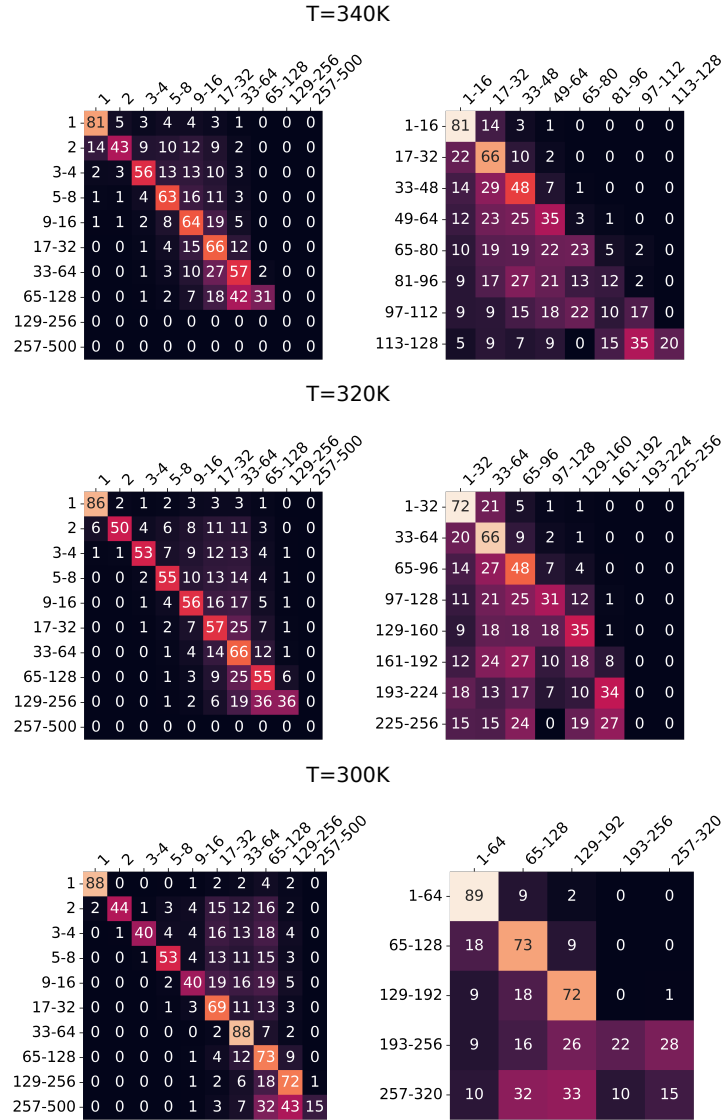

Supplementary Figure 29: Probability transition matrices for **BTA** systems sampled every  $\Delta\tau = 3$  ns and cut-off  $r_{\text{cut}} = 0.6$  nm. The data is grouped in size-ranges (binary and regular subdivision in the left and right panels, respectively).

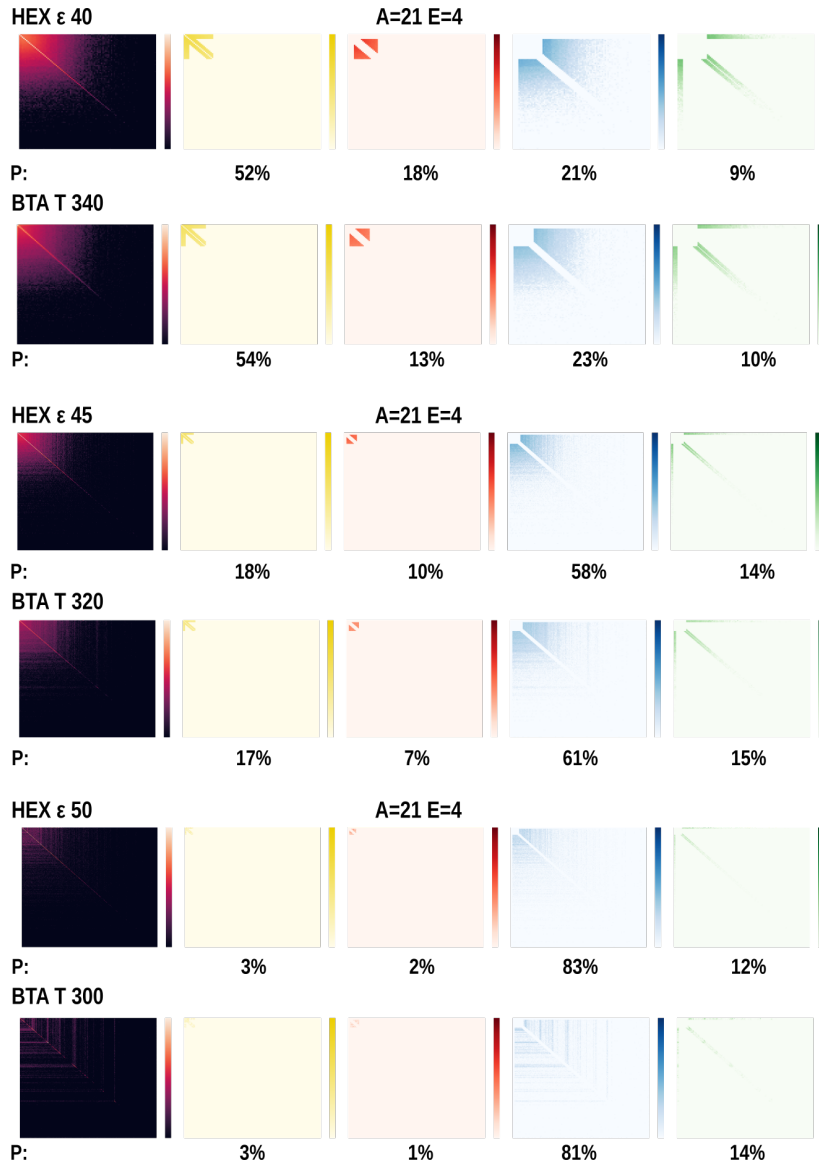

Supplementary Figure 30: Assembly transition matrices (see Methods for details): comparison between **M** system and **BTA** system for  $A = 21$  and  $E = \langle A \rangle / 5 \approx 4$  sampled every  $\Delta\tau = 3$  ns and cut-off radius  $r_{\text{cut}} = 0.6$  nm.

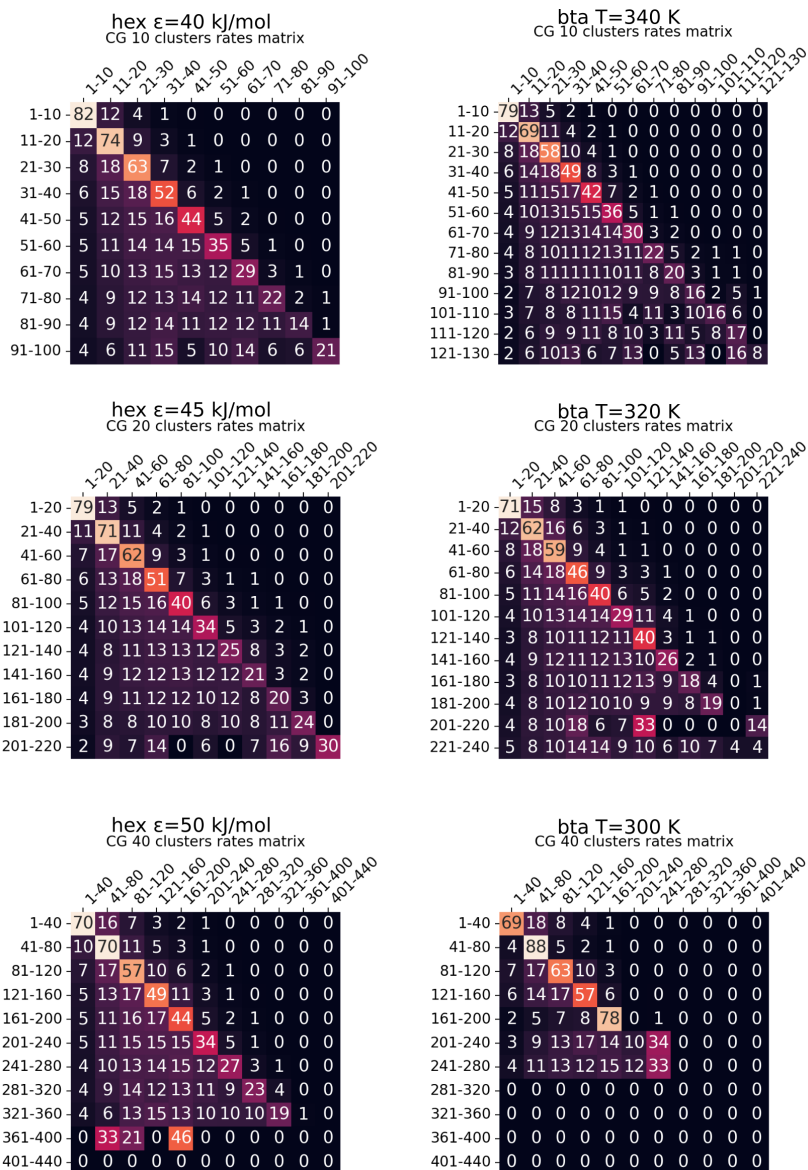

Supplementary Figure 31: Probability transition matrices for M and BTA systems sampled every  $\Delta\tau = 0.3$  ns and cut-off  $r_{\text{cut}} = 0.6$  nm. The data is grouped in size-ranges (linear size-ranges subdivision).

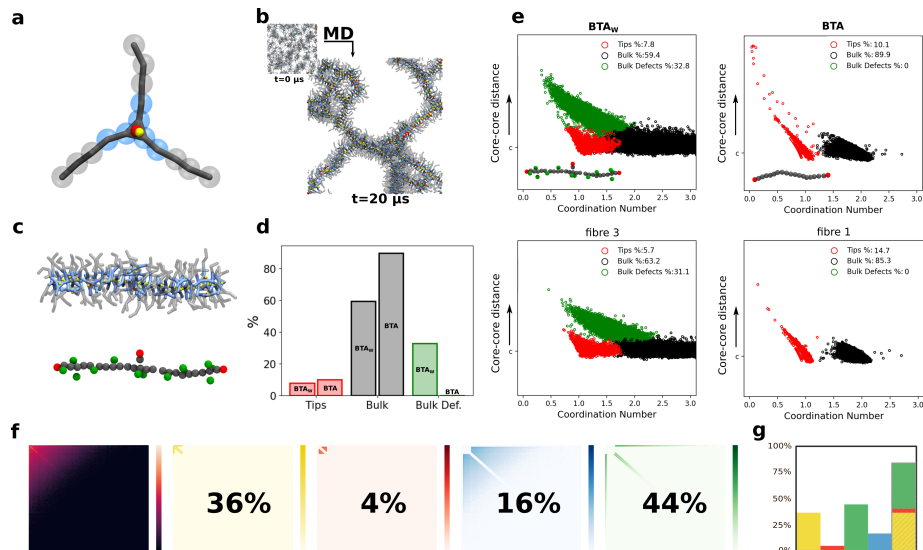

Supplementary Figure 32:  $BTA_w$  model equilibrium structure and dynamics. (a) CG model of the  $BTA_w$  monomer: the core monomers (blue beads) interactions are increased to  $\epsilon = 4 \text{ kJ mol}^{-1}$ , to reproduce the solvophobic effect. (b) Snapshot of  $BTA_w$  fibres formed spontaneously after  $t_{CG} = 20 \mu\text{s}$  of CG-MD, starting from 500 dispersed  $BTA_w$  monomers. (c) A single fibre of 40  $BTA_w$  monomers (top) and its core beads colored by their structural configurations (gray: bulk, green: bulk defects and red: tips) (bottom). (d) Comparison of the structural configurations between two fibres of 40 monomers each ( $BTA_w$  vs  $BTA$ ) obtained by identifying the monomers properties for a  $10 \mu\text{s}$  MD. (e) Comparison among the structure of an equilibrated 40 monomer fibre in: (top-left) the  $BTA_w$  model; (bottom-left) the *Fibre 3* explicit solvent model (reported in Ref. 49); (top-right)  $BTA$  model; (bottom-right) the *Fibre 1* explicit solvent model (Ref. 49). The scatter plots show the coordination number and the core-core distance (in stacking length units  $c$ ). The states are divided in clusters (indicated by different colors, as in (c)) according to the monomeric configuration. (f) Assembly transition matrices for the equilibrated 500 monomer  $BTA_w$  system (left), decomposed into areas identifying different classes of polymerisation/depolymerisation mechanisms (see Methods for details). The areas are defined by the parameters  $A = 21$  and  $E = \langle A \rangle / 5 \approx 4$ , as explained in the main text. The percentage is computed as the sum of each entry of the matrix in the considered area divided by the sum of all the entries of the matrix, without considering the diagonal. The obtained percentage are reported under each areas. (g) Summary of the mechanism probabilities: the mechanism involving small and medium species (yellow, red and green area) are grouped in the last column.

## Supplementary Methods

We here report the details on the models and force field parameters used for the **M**, **BTA** and **BTA<sub>w</sub>** monomer models, using the GROMACS .itp format for the force field and the GROMACS .gro format for example configurations.

### M monomer force-field

```
[ moleculetype ]
; molname          nrexcl
MON                1

[ atoms ]
;id type resnr residu atom cgnr  charge

1  M   1      MONM   M1   1   0
2  P   1      MON   P1   2   0
3  P   1      MON   P2   3   0
4  P   1      MON   P3   4   0
5  P   1      MON   P4   5   0
6  P   1      MON   P5   6   0
7  P   1      MON   P6   7   0

[bonds]
;  i      j      funct  length  force.c.
1    2      1      0.47   20000
1    3      1      0.47   20000
1    4      1      0.47   20000
1    5      1      0.47   20000
1    6      1      0.47   20000
1    7      1      0.47   20000
2    3      1      0.47   20000
3    4      1      0.47   20000
4    5      1      0.47   20000
5    6      1      0.47   20000
6    7      1      0.47   20000
7    2      1      0.47   20000
2    5      1      0.94   15000
3    6      1      0.94   15000
4    7      1      0.94   15000

[constraints]

[angles]
```

```

[dihedrals]

[exclusions]

[ defaults ]
1 2

[ atomtypes ]
; STANDARD types, 4:1 mapping
M  0  72.000  0.000  A  0.0  0.0
P  0  72.000  0.000  A  0.0  0.0

[ nonbond_params ]
; i j  funda c6 c12
; self terms
M  M  1  4.700000e-01 45.000000e+00 ; dm_rrVIII
P  P  1  4.700000e-01 0.200000e+00 ; dm_rrVIII
; cross terms
P  M  1  4.700000e-01 0.200000e+00 ; dm_rrVIII

```

## M monomer configuration

```

M Monomer
7
  1MONM  M1  1  0.000  0.000  0.000
  1MON   P1  2  0.470  0.000  0.000
  1MON   P2  3  0.235  0.407  0.000
  1MON   P3  4 -0.235  0.407  0.000
  1MON   P4  5 -0.470  0.000  0.000
  1MON   P5  6 -0.235 -0.407  0.000
  1MON   P6  7  0.235 -0.407  0.000
5.98336  5.98336  5.98336

```

## BTA monomer force-field

[moleculetype]

```
; molname      nrexcl
  BTA  1
```

[atoms]

| ; id | type | resnr | residu | atom | cgnr | charge |
|------|------|-------|--------|------|------|--------|
| 1    | C1   | 1     | BENZ   | M1   | 1    | 0      |
| 2    | C1   | 1     | BENZ   | M2   | 2    | 0      |
| 3    | C1   | 1     | BENZ   | M3   | 3    | 0      |
| 4    | C1   | 2     | MID    | M4   | 4    | 0      |
| 5    | C1   | 2     | MID    | M5   | 5    | 0      |
| 6    | C1   | 2     | MID    | M6   | 6    | 0      |
| 7    | C1   | 2     | ALKA   | C7   | 7    | 0      |
| 8    | C1   | 2     | ALKA   | C8   | 8    | 0      |
| 9    | C1   | 2     | ALKA   | C9   | 9    | 0      |
| 10   | C1   | 3     | ALKA   | C10  | 10   | 0      |
| 11   | C1   | 3     | ALKA   | C11  | 11   | 0      |
| 12   | C1   | 3     | ALKA   | C12  | 12   | 0      |
| 13   | C1   | 3     | ALKA   | C13  | 13   | 0      |
| 14   | C1   | 3     | ALKA   | C14  | 14   | 0      |
| 15   | C1   | 3     | ALKA   | C15  | 15   | 0      |
| 16   | P5   | 4     | DIP    | D16  | 16   | 0      |
| 17   | D    | 5     | HP     | H17  | 17   | 1.40   |
| 18   | D    | 5     | HN     | H18  | 18   | -1.40  |

[constraints]

```
  16 17 1      0.14  22000
  16 18 1      0.14  22000
```

[bonds]

```
; i j funct  length
  1 2 1      0.46  22000
  2 3 1      0.46  22000
  3 1 1      0.46  22000
  1 16 1     0.2656 22000
  2 16 1     0.2656 22000
  3 16 1     0.2656 22000
; BENZ-MID
  1 4 1      0.46   5500
  2 5 1      0.46   5500
  3 6 1      0.46   5500
; MID-MID
  4 7 1      0.46   5500
```

```

5 8 1      0.46  5500
6 9 1      0.46  5500
; MID-ALKA
7 10 1     0.46  5500
8 11 1     0.46  5500
9 12 1     0.46  5500
; ALKA-ALKA
10 13 1    0.46  5500
11 14 1    0.46  5500
12 15 1    0.46  5500

```

```

[angles]
; i j k funct angle force.c.
3 2 5      2    150   1500
2 1 4      2    150   1500
1 3 6      2    150   1500
;
1 2 5      2    150   1500
3 1 4      2    150   1500
2 3 6      2    150   1500
;
1 4 7      2    180.0 10
2 5 8      2    180.0 10
3 6 9      2    180.0 10
;
4 7 10     2    180.0 10
5 8 11     2    180.0 10
6 9 12     2    180.0 10
;
7 10 13    2    180.0 10
8 11 14    2    180.0 10
9 12 15    2    180.0 10
;
17 16 18   2    180.0 1500

```

```

[exclusions]
17 18

```

```

[ defaults ]
1 1

```

```

[ atomtypes ]
; STANDARD types, 4:1 mapping
P5  72.0 0.000 A 0.0 0.0
C1  72.0 0.000 A 0.0 0.0

```



D 24.0 0.000 A 0.0 0.0

```
[ nonbond_params ]
; i j      funda c6 c12
; self terms
P5 P5      1  1.07792e-01  1.16191e-03 ; eps=2.5
C1 C1      1  4.31169e-02  4.64766e-04 ; eps=1.0
D D        1  0.00000E-00  0.00000E-00 ; no LJ interaction
; cross terms
P5 C1      1  2.15584e-02  2.32383e-04 ; eps=0.5
D P5      1  0.00000E-00  0.00000E-00 ; no LJ interaction
D C1      1  0.00000E-00  0.00000E-00 ; no LJ interaction
```

## BTA<sub>w</sub> monomer force-field

```
[moleculetype]
; molname      nrexcl
BTA 1

[atoms]
; id  type  resnr  residu  atom  cgnr  charge
1  M1  1  BENZ  M1  1  0
2  M1  1  BENZ  M2  2  0
3  M1  1  BENZ  M3  3  0
4  M1  2  MID  M4  4  0
5  M1  2  MID  M5  5  0
6  M1  2  MID  M6  6  0
7  C1  2  ALKA  C7  7  0
8  C1  2  ALKA  C8  8  0
9  C1  2  ALKA  C9  9  0
10 C1  3  ALKA  C10 10  0
11 C1  3  ALKA  C11 11  0
12 C1  3  ALKA  C12 12  0
13 C1  3  ALKA  C13 13  0
14 C1  3  ALKA  C14 14  0
15 C1  3  ALKA  C15 15  0
16 P5  4  DIP  D16 16  0
17 D  5  HP  H17 17  1.40
```

18 D 5 HN H18 18 -1.40

[constraints]

16 17 1 0.14 22000  
16 18 1 0.14 22000

[bonds]

```
; i j funct length
1 2 1 0.46 22000
2 3 1 0.46 22000
3 1 1 0.46 22000
1 16 1 0.2656 22000
2 16 1 0.2656 22000
3 16 1 0.2656 22000
; BENZ-MID
1 4 1 0.46 5500
2 5 1 0.46 5500
3 6 1 0.46 5500
; MID-MID
4 7 1 0.46 5500
5 8 1 0.46 5500
6 9 1 0.46 5500
; MID-ALKA
7 10 1 0.46 5500
8 11 1 0.46 5500
9 12 1 0.46 5500
; ALKA-ALKA
10 13 1 0.46 5500
11 14 1 0.46 5500
12 15 1 0.46 5500
```

[angles]

```
; i j k funct angle force.c.
3 2 5 2 150 1500
2 1 4 2 150 1500
1 3 6 2 150 1500
;
1 2 5 2 150 1500
3 1 4 2 150 1500
2 3 6 2 150 1500
;
1 4 7 2 180.0 10
2 5 8 2 180.0 10
3 6 9 2 180.0 10
```

```

;
  4  7 10      2    180.0   10
  5  8 11      2    180.0   10
  6  9 12      2    180.0   10
;
  7 10 13      2    180.0   10
  8 11 14      2    180.0   10
  9 12 15      2    180.0   10
;
17 16 18      2    180.0  1500

[exclusions]
17 18

[ defaults ]
1 1

[ atomtypes ]
; STANDARD types, 4:1 mapping
P5  72.0 0.000 A 0.0 0.0
C1  72.0 0.000 A 0.0 0.0
M1  72.0 0.000 A 0.0 0.0
D   24.0 0.000 A 0.0 0.0

[ nonbond_params ]
; i j  funda c6 c12
; self terms
P5  P5      1  1.07792e-01  1.16191e-03 ; eps=2.5
C1  C1      1  4.31169e-02  4.64766e-04 ; eps=1.0
M1  M1      1  1.72467e-01  1.85906e-03 ; eps=4
D   D       1  0.00000E-00  0.00000E-00 ; no LJ interaction
; cross terms
P5  C1      1  2.15584e-02  2.32383e-04 ; eps=0.5
P5  M1      1  2.15584e-02  2.32383e-04 ; eps=0.5
C1  M1      1  2.15584e-02  2.32383e-04 ; eps=0.5
D   P5      1  0.00000E-00  0.00000E-00 ; no LJ interaction
D   C1      1  0.00000E-00  0.00000E-00 ; no LJ interaction
D   M1      1  0.00000E-00  0.00000E-00 ; no LJ interaction

[ defaults ]
1 1

[ atomtypes ]
; STANDARD types, 4:1 mapping
P5  72.0 0.000 A 0.0 0.0
C1  72.0 0.000 A 0.0 0.0

```

```

M1  72.0 0.000 A 0.0 0.0
D   24.0 0.000 A 0.0 0.0

```

```
[ nonbond_params ]
```

```
; i j  funda c6 c12
```

```
; self terms
```

```

P5  P5      1  1.07792e-01    1.16191e-03 ; eps=2.5
C1  C1      1  4.31169e-02    4.64766e-04 ; eps=1.0
M1  M1      1  1.72467e-01    1.85906e-03 ; eps=4
D   D       1  0.00000E-00    0.00000E-00 ; no LJ interaction
P5  C1      1  2.15584e-02    2.32383e-04 ; eps=0.5
P5  M1      1  2.15584e-02    2.32383e-04 ; eps=0.5
C1  M1      1  2.15584e-02    2.32383e-04 ; eps=0.5
D   P5      1  0.00000E-00    0.00000E-00 ; no LJ interaction
D   C1      1  0.00000E-00    0.00000E-00 ; no LJ interaction
D   M1      1  0.00000E-00    0.00000E-00 ; no LJ interaction

```

## BTA (and BTA<sub>w</sub>) monomer configuration

BTA

18

|       |     |    |       |        |        |
|-------|-----|----|-------|--------|--------|
| 1BENZ | M1  | 1  | 1.314 | 19.651 | 10.175 |
| 1BENZ | M2  | 2  | 1.030 | 19.440 | 10.472 |
| 1BENZ | M3  | 3  | 1.215 | 19.879 | 10.543 |
| 2MID  | M4  | 4  | 1.545 | 19.601 | 9.886  |
| 2MID  | M5  | 5  | 0.690 | 19.240 | 10.500 |
| 2MID  | M6  | 6  | 1.397 | 20.158 | 10.819 |
| 3ALKA | C7  | 7  | 1.889 | 19.852 | 9.883  |
| 3ALKA | C8  | 8  | 0.976 | 19.040 | 10.306 |
| 3ALKA | C9  | 9  | 1.345 | 19.875 | 11.031 |
| 4ALKA | C10 | 10 | 1.730 | 20.057 | 10.156 |
| 4ALKA | C11 | 11 | 1.138 | 19.169 | 10.042 |
| 4ALKA | C12 | 12 | 1.078 | 19.631 | 10.893 |
| 4ALKA | C13 | 13 | 1.565 | 20.281 | 10.415 |
| 4ALKA | C14 | 14 | 1.477 | 19.228 | 9.880  |
| 4ALKA | C15 | 15 | 0.769 | 19.336 | 10.813 |
| 5DIP  | D16 | 16 | 1.173 | 19.674 | 10.385 |

|          |          |          |       |        |        |
|----------|----------|----------|-------|--------|--------|
| 6HP      | H17      | 17       | 1.317 | 19.646 | 10.466 |
| 7HN      | H18      | 18       | 1.045 | 19.673 | 10.329 |
| 50.00000 | 50.00000 | 50.00000 |       |        |        |
